# Supplementary material for: Perception and Readiness to Undertake Maggot Debridement Therapy with the Use of Lucilia sericata Larvae in the Group of Nurses
Source: MDPI journal article supplement (doi:10.3390/ijerph19052895), 2022-03-02
Supplement: s1 [file s1]

## S1. Questionare of the perception of MDT

Please read the statements carefully and refer to them based on the categories of answers as far as you know.

1. The use of *Lucilia sericata* larvae accelerates the debridement of necrotic tissue in the treatment of chronic wounds compared to autolytic and mechanical methods

|                     |                   |                   |                 |                   |
|---------------------|-------------------|-------------------|-----------------|-------------------|
| I strongly disagree | I rather disagree | I have no opinion | I tend to agree | I definetly agree |
|---------------------|-------------------|-------------------|-----------------|-------------------|

2. A single maggot can remove 25 mg of necrotic material from a wound in 24 hours

|                     |                   |                   |                 |                   |
|---------------------|-------------------|-------------------|-----------------|-------------------|
| I strongly disagree | I rather disagree | I have no opinion | I tend to agree | I definetly agree |
|---------------------|-------------------|-------------------|-----------------|-------------------|

3. Brown exudate with a specific smell during MDT therapy is a positive symptom suggesting liquefaction of necrotic tissue by the larvae

|                     |                   |                   |                 |                   |
|---------------------|-------------------|-------------------|-----------------|-------------------|
| I strongly disagree | I rather disagree | I have no opinion | I tend to agree | I definetly agree |
|---------------------|-------------------|-------------------|-----------------|-------------------|

4. 5-10 larvae are usually used per 1cm<sup>2</sup> for wound debridement

|                     |                   |                   |                 |                   |
|---------------------|-------------------|-------------------|-----------------|-------------------|
| I strongly disagree | I rather disagree | I have no opinion | I tend to agree | I definetly agree |
|---------------------|-------------------|-------------------|-----------------|-------------------|

5. Wound edge protection is essential to protect the skin from migration and irritation by larvae defensins (secretions)

|                     |                   |                   |                 |                   |
|---------------------|-------------------|-------------------|-----------------|-------------------|
| I strongly disagree | I rather disagree | I have no opinion | I tend to agree | I definetly agree |
|---------------------|-------------------|-------------------|-----------------|-------------------|

6. I am committed to improving the patient's quality of life and healing the wound that I am dealing with

|                     |                   |                   |                 |                   |
|---------------------|-------------------|-------------------|-----------------|-------------------|
| I strongly disagree | I rather disagree | I have no opinion | I tend to agree | I definetly agree |
|---------------------|-------------------|-------------------|-----------------|-------------------|

7. I am motivated to conduct educational activities so that the patient tolerates MDT as good as possible

|                     |                   |                   |                 |                    |
|---------------------|-------------------|-------------------|-----------------|--------------------|
| I strongly disagree | I rather disagree | I have no opinion | I tend to agree | I definitely agree |
|---------------------|-------------------|-------------------|-----------------|--------------------|

8. I change the top dressings and control the wound in such a way to minimize patient's visual contact with the larvae in the wound

|                     |                   |                   |                 |                    |
|---------------------|-------------------|-------------------|-----------------|--------------------|
| I strongly disagree | I rather disagree | I have no opinion | I tend to agree | I definitely agree |
|---------------------|-------------------|-------------------|-----------------|--------------------|

9. I point out the benefits of topical wound therapy with MDT to the patient

|                     |                   |                   |                 |                    |
|---------------------|-------------------|-------------------|-----------------|--------------------|
| I strongly disagree | I rather disagree | I have no opinion | I tend to agree | I definitely agree |
|---------------------|-------------------|-------------------|-----------------|--------------------|

10. I implement MDT in case patient accepts it and clinical indications

|                     |                   |                   |                 |                    |
|---------------------|-------------------|-------------------|-----------------|--------------------|
| I strongly disagree | I rather disagree | I have no opinion | I tend to agree | I definitely agree |
|---------------------|-------------------|-------------------|-----------------|--------------------|
